# Supplementary material
Source: HighWire-hosted journal article supplement (https://www.cmajopen.ca/highwire/filestream/80853/field_highwire_adjunct_files/4/open-2015-0088-5-at.pdf)
Supplement: open-2015-0088-5-at.pdf [file open-2015-0088-5-at.pdf]

Appendix 5 (as supplied by the authors): Cost-Effectiveness Acceptability Curve

Figure A5: Cost-Effectiveness Acceptability Curve: Mechanical Thrombectomy plus Intravenous Thrombolysis versus Intravenous Thrombolysis Alone

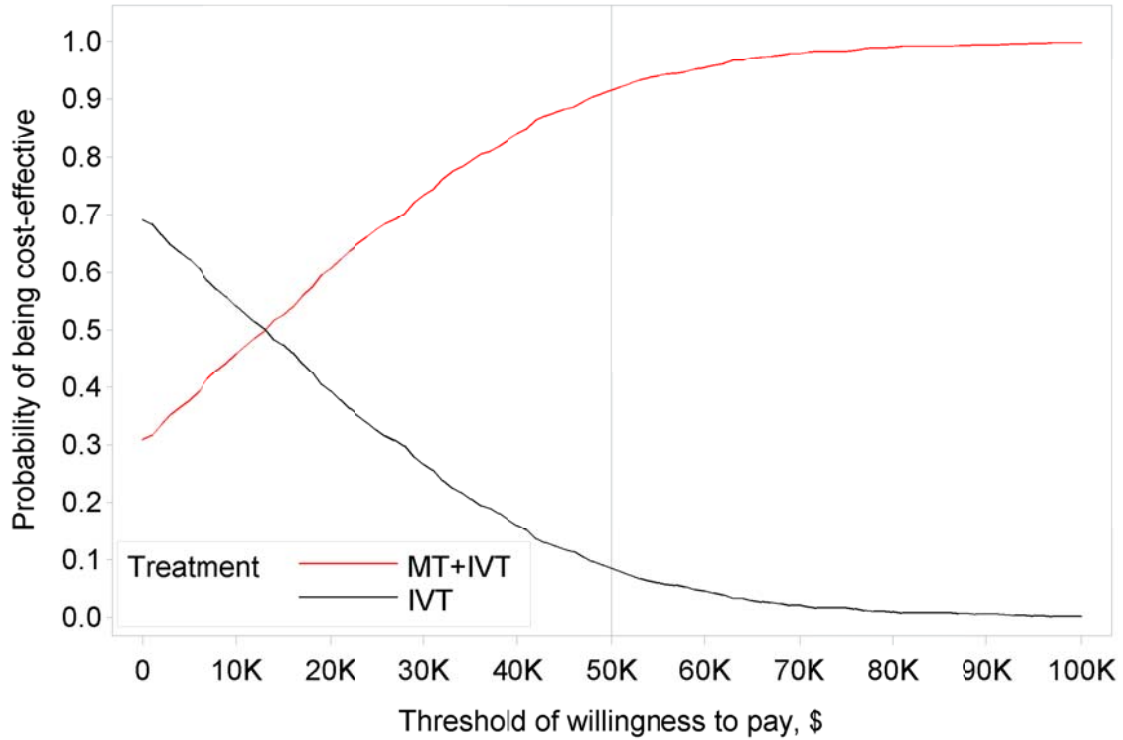

Abbreviations: MT, mechanical thrombectomy; IVT, intravenous thrombolysis.
